# Supplementary material for: Genome-wide studies of the multi-zinc finger Drosophila Suppressor of Hairy-wing protein in the ovary
Source: PubMed Central journal article supplement — Nucleic Acids Res. 2012 Feb 9;40(12):5415–31. doi: 10.1093/nar/gks225 (PMC3384341; doi:10.1093/nar/gks225), 2012-02-09
Supplement: supp_gks225_nar-03088-v-2011-File010.pdf [file supp_gks225_nar-03088-v-2011-File010.pdf]

**Supplemental Figure 1. Loss of ZnF10 does not affect interaction between Su(Hw) and the gypsy insulator proteins Mod67.2 or CP190.** **A.** Electrophoretic mobility shift analyses (EMSA) of a representative SBS with bacterially expressed Su(Hw)<sup>+</sup> or Su(Hw)<sup>f</sup>, CP190 and Mod67.2. Both Su(Hw)<sup>+</sup> and Su(Hw)<sup>f</sup> retard migration of the DNA probe and produce an equivalent supershift upon addition of CP190 or CP190 and Mod67.2 **B.** Bacterially expressed and purified carboxy-terminal HIS-tagged Su(Hw)<sup>+</sup>, Su(Hw)<sup>f</sup>, CP190 and Mod67.2 were resolved on a 7.5% SDS-PAGE and detected by silver staining. Of note, His-tagged CP190 is unstable when produced in bacteria, such that only reduced levels of full length protein (arrowhead) can be obtained. Based on our SDS-PAGE analyses, we estimated that the amount of full length CP190 used in the EMSA studies corresponded to that used for Su(Hw)<sup>+</sup> and Su(Hw)<sup>f</sup>. Molecular weight markers are shown to the left.

**Supplemental Figure 2. Loss of ZnF10 decreases the DNA-binding capacity of Su(Hw)<sup>f</sup> *in vitro*.** **A.** EMSA of six f-retained and seven f-lost sites. <sup>32</sup>P-labeled fragments were incubated with no (-) or increasing amounts of bacterially purified Su(Hw)<sup>+</sup> (top row) or Su(Hw)<sup>f</sup> (bottom row) protein. Each lane contained a three-fold increase in protein, beginning at 0.003 μg. The *hsp26* fragment contains no Su(Hw) binding motif and serves as a negative control. **B.** Analysis of recombinant Su(Hw) protein. Bacterially expressed Su(Hw)<sup>+</sup> (wt) and Su(Hw)<sup>f</sup> (f) were resolved on an 8% SDS-PAGE and detected by silver staining (left) or western blot with Su(Hw) antibodies (right). Molecular weight markers are shown to the left.

**Supplemental Figure 3. Mapping Su(Hw)<sup>f</sup>-lost and Su(Hw)<sup>f</sup>-retained SBSs to chromatin domains defined in *Drosophila* cell lines.** Shown are bar graphs mapping SBSs to chromatin

domains defined in the S2 (left) and BG3 (right) cell lines (Kharchenko et al. 2011). These analyses revealed no significant differences between f-retained and f-lost SBSs.

# SUPPLEMENTAL FIGURE 1

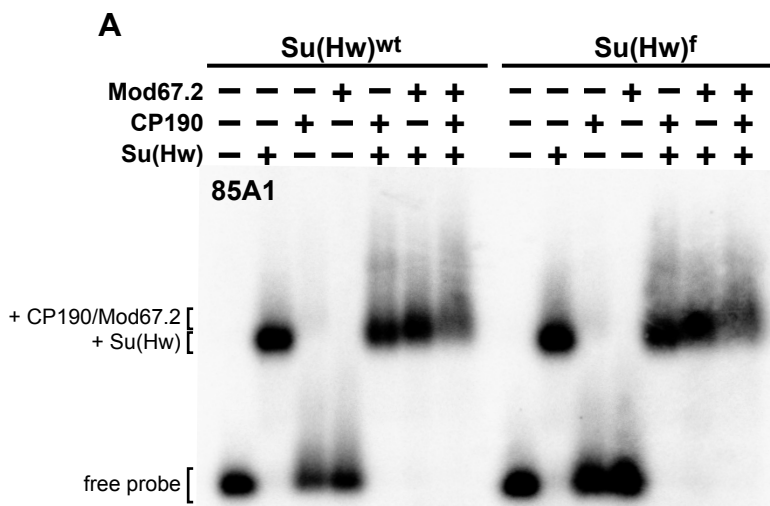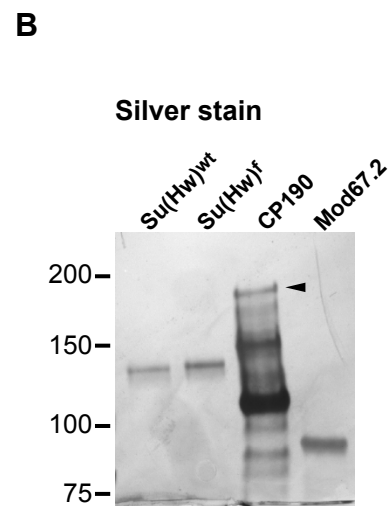

**SUPPLEMENTAL FIGURE 2**

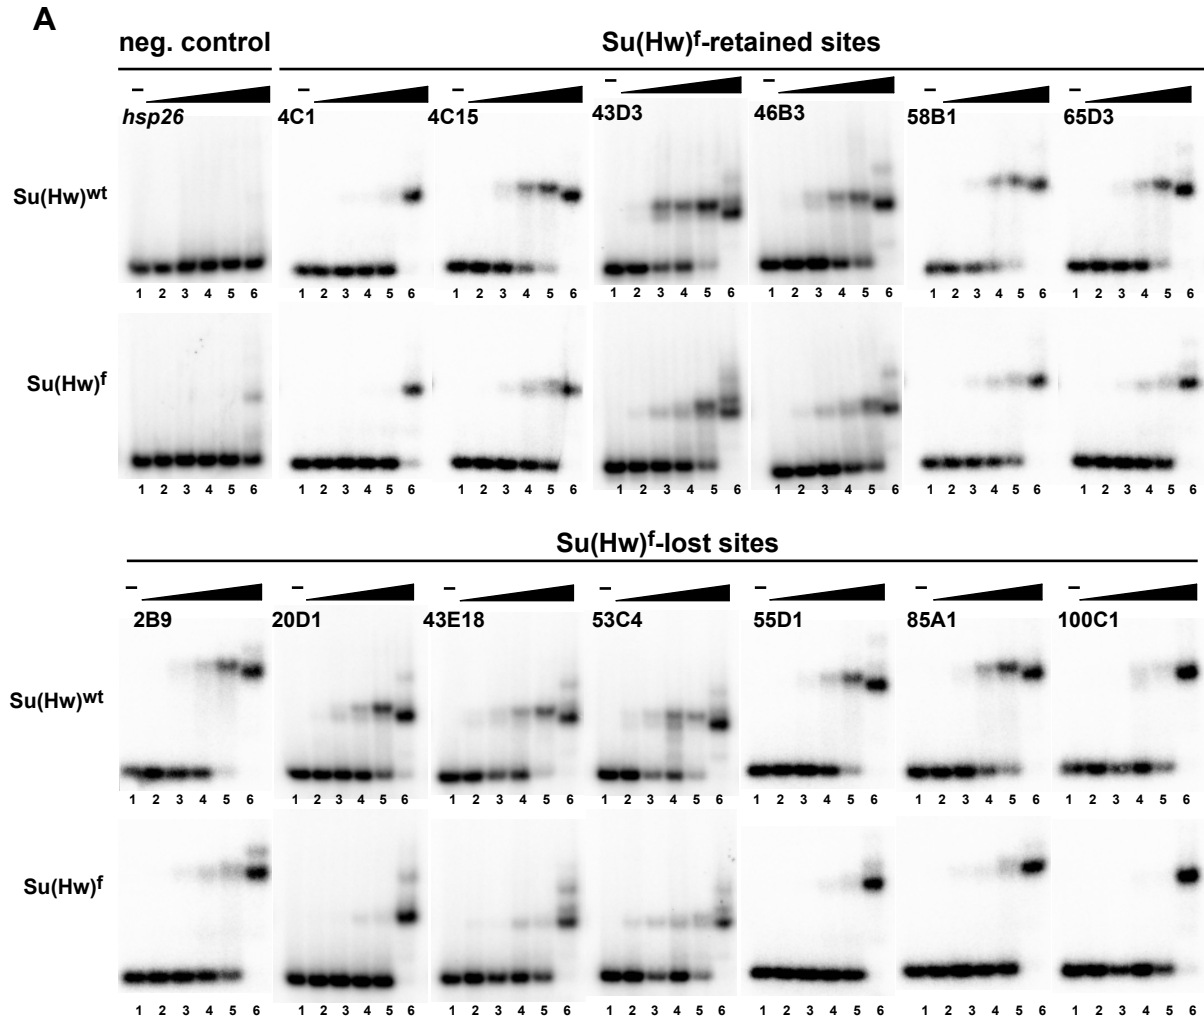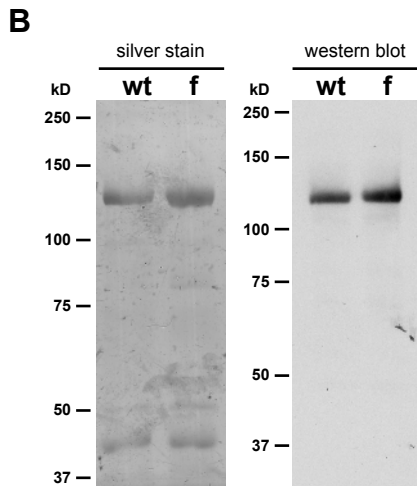

### SUPPLEMENTAL FIGURE 3

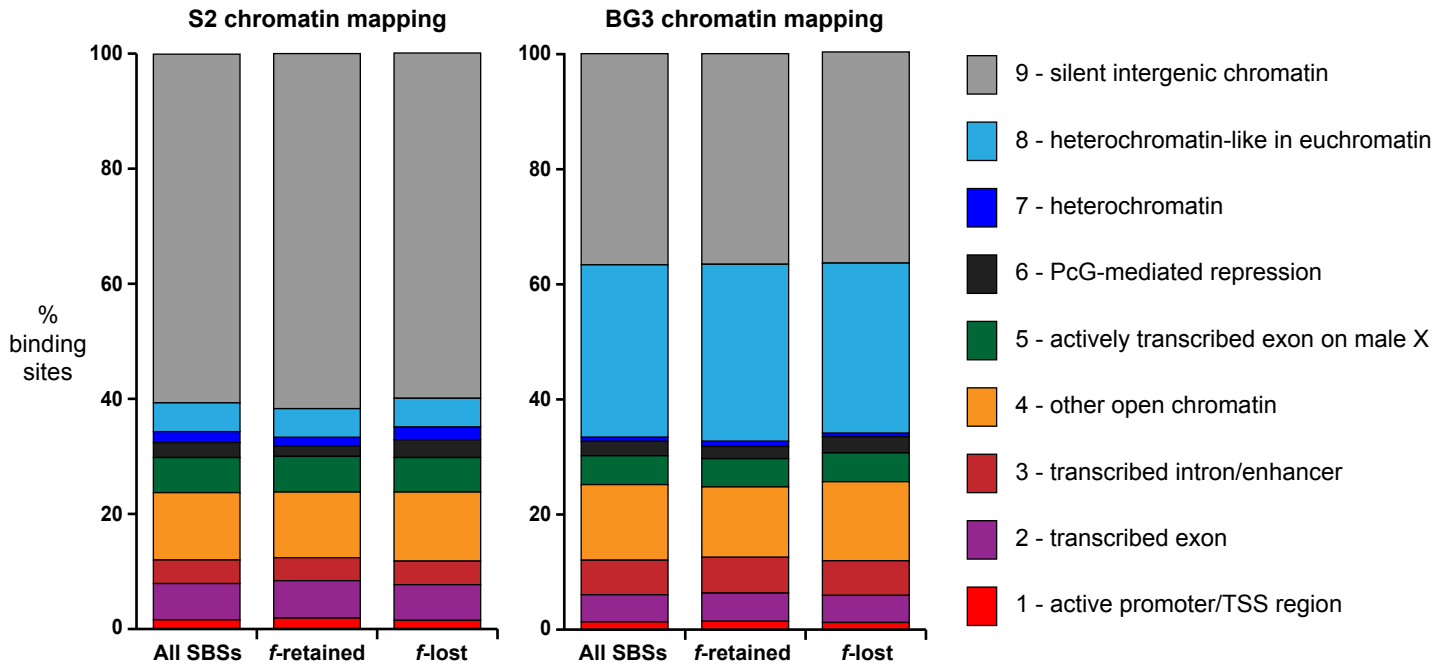

**Supplemental Table 1**

| <b>Dataset</b>                    | <b>Total tags</b> | <b>Unique aligned</b> | <b>Multiple aligned</b> | <b>Unaligned</b> | <b>% mappable tags</b> | <b>% genome coverage</b> |
|-----------------------------------|-------------------|-----------------------|-------------------------|------------------|------------------------|--------------------------|
| <i>su(Hw)<sup>f/v</sup> IP</i>    | 21369901          | 20685020              | 390223                  | 294658           | 96.8                   | 7.22                     |
| <i>su(Hw)<sup>f/v</sup> input</i> | 21247086          | 20596448              | 426521                  | 224117           | 96.9                   | 7.18                     |
| <i>su(Hw)<sup>f/v</sup> IgG</i>   | 20803937          | 20130453              | 470581                  | 202903           | 96.8                   | 7.03                     |
| <i>su(Hw)<sup>WT</sup> IP</i>     | 21541101          | 20988838              | 323940                  | 228323           | 97.4                   | 7.28                     |
| <i>su(Hw)<sup>WT</sup> input</i>  | 14573806          | 13993613              | 336326                  | 243867           | 96                     | 4.92                     |
| <i>su(Hw)<sup>WT</sup> IgG</i>    | 12835674          | 12173587              | 415600                  | 246487           | 94.8                   | 4.34                     |

**Supplemental Table 2. Overlap between ovary and non-ovary SBSs**

| <b>Dataset</b>                               | <b>Accession number / Reference</b> | <b># of sites</b> | <b>Median site length (bp)</b> | <b># of sites (% overlap)</b> |
|----------------------------------------------|-------------------------------------|-------------------|--------------------------------|-------------------------------|
| Geyer lab ovary: <i>su(Hw)</i> <sup>WT</sup> | GSE33052                            | 2932              | 293                            |                               |
| Geyer lab ovary: <i>su(Hw)</i> <sup>f</sup>  | GSE33052                            | 1210              | 249                            |                               |
| Corces lab KC cells                          | Bushey et al., 2009                 | 3747              | 340                            | 2503 (78.8)                   |
| Corces lab Mbn2 cells                        | Bushey et al., 2009                 | 3481              | 340                            | 2100 (66.1)                   |
| White lab 0-12 hr embryos                    | modENCODE_27                        | 4779              | 903                            | 2700 (85.0)                   |
| White lab 0-12 hr embryos PG ab*             | modENCODE_901                       | 3947              | 1620                           | 2957 (93.1)                   |
| Pirrotta lab S2 cells                        | modENCODE_330                       | 4173              | 2519                           | 2887 (90.9)                   |
| Pirrotta lab BG3 cells                       | modENCODE_951                       | 4459              | 2490                           | 2900 (91.3)                   |
| Pirrotta lab S2 cells VC ab**                | modENCODE_331                       | 4094              | 2501                           | 2874 (90.5)                   |

\* Rabbit  $\alpha$ -Su(Hw) antibody from the Geyer lab

\*\*  $\alpha$ -Su(Hw) antibody from the Corces lab
